# Supplementary material for: Comparison between mandibular and femur derived bone marrow stromal cells: osteogenic and angiogenic potentials in vitro and bone repairing ability in vivo
Source: Royal Society of Chemistry journal article supplement (doi:10.1039/c7ra07139f), 2017-01-01
Supplement: c7ra07139f1.pdf [file c7ra07139f1.pdf]

## Supporting information

### **Comparison between mandibular and femur derived bone marrow stromal cells: osteogenic and angiogenic potentials *in vitro* and bone repairing ability *in vivo***

WenhuiZhou<sup>a</sup>, JinkaiZhang<sup>a</sup>, KailiLin<sup>b,\*</sup>, Fengshan Chen<sup>a,\*</sup>

<sup>a</sup>Department of Orthodontics, School & Hospital of Stomatology, Tongji University, Shanghai Engineering Research Center of Tooth Restoration and Regeneration, Shanghai 200072, China.

<sup>b</sup>School & Hospital of Stomatology, Tongji University, Shanghai Engineering Research Center of Tooth Restoration and Regeneration, Shanghai 200072, China.

\*Corresponding author: Tel: 86-21-56722215, Fax: 86-21-66524025. E-mail:

linkaili@tongji.edu.cn, lklecnu@aliyun.com (**K. Lin**);

13681746901@126.com (**F. Chen**).

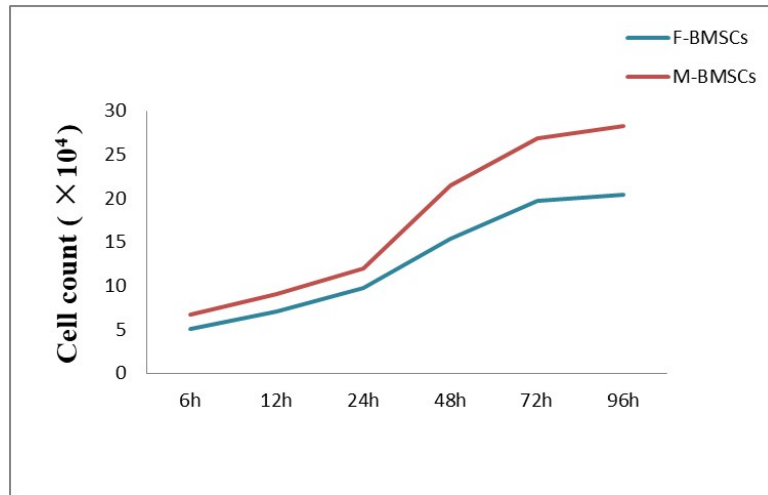

Fig. S1. Grows curve of M-BMSCs and F-BMSCs. The result showed the higher proliferation rate in M-BMSCs than that of F-BMSCs through the entire culture period

**Table S1.** Average cell population doubling time (PDT)\*:

| Group   | Average PDT |
|---------|-------------|
| F-BMSCs | 47.6± 4.5 h |
| M-BMSCs | 41.3± 3.2 h |

\* Population doubling time (PDT) was calculated according to the following equation:

$$PDT = T \times \log 2 / (\log N_t - \log N_0)$$

(N: cell number, T: incubation time 0–t, t: time t, and 0: initial time)
